# Supplementary material for: A cross-sectional study on the lifestyle of patients with Hashimoto's thyroiditis
Source: Research Square preprint supplement (doi:10.21203/rs.3.rs-8574696/v1), 2026-02-04
Supplement: Supplementary file 1 [file d0dd9c68201833c3c89a2e7e.docx]

## Daily Dietary Intake Questionnaire

Instructions: One serving refers to approximately the size of one palm (excluding fingers) or a deck of cards, equivalent to about 80 g.

Meat (pork, beef, lamb, poultry): How often do you consume meat?
_____ times/day or _____ times/week
☐ Daily ☐ ≥3 times/week ☐ <3 times/week ☐ Never

Fish: How often do you consume fish?
_____ times/day or _____ times/week
☐ Daily ☐ ≥3 times/week ☐ <3 times/week ☐ Never

Eggs (including yolks): How often do you usually consume eggs?
_____ eggs/day or _____ eggs/week
☐ Daily ☐ ≥3 times/week ☐ <3 times/week ☐ Never

Legumes and soy products (e.g., tofu, soy milk, natto): How often do you consume these foods?
_____ times/day or _____ times/week
☐ Daily ☐ ≥3 times/week ☐ <3 times/week ☐ Never

Seafood other than fish (e.g., shrimp, crab, shellfish, seaweed): How often do you consume these foods?
_____ times/day or _____ times/week
☐ Daily ☐ ≥3 times/week ☐ <3 times/week ☐ Never

Nuts (one serving ≈ one handful, e.g., walnuts, peanuts, seeds): How often do you consume nuts?
_____ times/day or _____ times/week
☐ Daily ☐ ≥3 times/week ☐ <3 times/week ☐ Never

Dairy products (milk, yogurt, cheese; one serving ≈ 200 mL/g): How often do you consume dairy products?
_____ times/day or _____ times/week
☐ Daily ☐ ≥3 times/week ☐ <3 times/week ☐ Never

Vegetables: How often do you consume fresh vegetables?
_____ times/day or _____ times/week
☐ Daily ☐ ≥3 times/week ☐ <3 times/week ☐ Never

Fruits: How often do you consume fresh fruits?
_____ times/day or _____ times/week
☐ Daily ☐ ≥3 times/week ☐ <3 times/week ☐ Never

Refined staple foods (e.g., white rice, white noodles, white bread): How often do you consume refined grains?
_____ times/day or _____ times/week
☐ Daily ☐ ≥3 times/week ☐ <3 times/week ☐ Never

Whole grains (e.g., brown rice, oats, whole wheat bread): How often do you consume whole grains?
_____ times/day or _____ times/week
☐ Daily ☐ ≥3 times/week ☐ <3 times/week ☐ Never

Olive oil: How often do you use olive oil for cooking or seasoning?
_____ times/day or _____ times/week
☐ Daily ☐ ≥3 times/week ☐ <3 times/week ☐ Never

Iodized salt: How often do you use iodized salt in your daily diet?
_____ times/day or _____ times/week
☐ Daily ☐ ≥3 times/week ☐ <3 times/week ☐ Never

## Daily Physical Activity Questionnaire

Over the past month, how much time did you spend engaging in different types of physical activity?

Light-intensity physical activity (intensity criteria: steady breathing, able to sing comfortably; examples include walking, household chores, gentle stretching).
Type of activity: ________________________________
Duration: _____ minutes/day or _____ minutes/week or _____ minutes/month

Moderate-intensity physical activity (moderate intensity defined as noticeably increased heart rate and breathing while still able to carry on a conversation; examples include brisk walking, dancing, aerobics, recreational cycling, gardening, golf, jogging, rope skipping, table tennis, and volleyball).
Type of activity: ________________________________
Duration: _____ minutes/day or _____ minutes/week or _____ minutes/month

High-intensity physical activity (high intensity defined as very rapid heart rate and breathing, making conversation difficult; examples include running, fast swimming, vigorous cycling, and competitive sports).
Type of activity: ________________________________
Duration: _____ minutes/day or _____ minutes/week or _____ minutes/month
